# Supplementary material for: ITIC surface modification to achieve synergistic electron transport layer enhancement for planar-type perovskite solar cells with efficiency exceeding 20%
Source: Royal Society of Chemistry journal article supplement (doi:10.1039/c7ta01636k), 2017-01-01
Supplement: c7ta01636k1.pdf [file c7ta01636k1.pdf]

## **Supporting Information**

### **ITIC Surface Modification to Achieve Synergistic Electron Transport Layer Enhancement for Planar-Type Perovskite Solar Cells with Efficiency Exceeding 20%**

Jiexuan Jiang<sup>1</sup>, Zhiwen Jin<sup>1,\*</sup>, Jie Lei<sup>1</sup>, Qian Wang<sup>1</sup>, Xisheng Zhang<sup>1</sup>, Jingru Zhang<sup>1</sup>,  
Fei Gao<sup>1,\*</sup> and Shengzhong (Frank) Liu<sup>1,2,\*</sup>

<sup>1</sup>Key Laboratory of Applied Surface and Colloid Chemistry, National Ministry of Education; Shaanxi Key Laboratory for Advanced Energy Devices; Shaanxi Engineering Lab for Advanced Energy Technology, School of Materials Science and Engineering, Shaanxi Normal University, Xi'an 710119, China.  
E-mail: jinzhiwen@snnu.edu.cn, feigao@snnu.edu.cn and liusz@snnu.edu.cn

<sup>2</sup>Dalian National Laboratory for Clean Energy; iChEM, Dalian Institute of Chemical Physics, Chinese Academy of Sciences, Dalian, 116023, China.

### UPS measurement:

UPS is usually used to determine the Fermi level ( $E_F$ ) and the valence band maximum ( $E_V$ ) with respect to vacuum level ( $E_{VAC}$ ) of the fabricated thin films.<sup>[1,2]</sup> For a photoelectron to escape the sample surface and to be collected, it has to have sufficient energy to overcome the sum of the binding energy (with respect to  $E_F$ ) of its initial level and the work function ( $\Phi$ ), where  $\Phi = E_{VAC} - E_F$ . Therefore, for a fixed incident photon energy of 21.22 eV, the secondary electron cut-off (high binding energy edge) represents photoelectrons with zero kinetic energy when they escape from the sample surface. The work function  $\Phi$  is determined by the difference between the incident photon energy (21.22 eV) and the binding energy of the secondary electron cut-off. The difference between  $E_F$  and  $E_V$  is determined by the intersection of the linear portion of the spectra near the Fermi edge (low binding energy region) with the baseline. **Figure 4b** shows the UPS data which allows us to determine the work function of both  $TiO_2$  and  $TiO_2$  coated with ITIC.

### TRPL measurement:

The TRPL decay time and amplitudes are obtained using an exponential Equation (1):<sup>[3,4]</sup>

$$f(x) = \sum_i A_i \exp(-t/\tau_i) + K \quad (1)$$

where  $A_i$  is the decay amplitude,  $\tau_i$  is the decay time and  $K$  is a constant for the base-line offset. To understand the recombination mechanism of the perovskite thin films on different substrates, the recombination kinetics was modelled over a range of excitation intensities using the following Equation (2):<sup>[3,4]</sup>

$$-\frac{dn}{dt} = An + Bn^2 + Cn^3 \quad (2)$$

where  $n$  is the photogenerated excess carrier density and  $t$  is the time. The physical interpretations of these three terms are (i) the first-order decay rate is due to the trap-mediated (Shockley-Hall-Read) recombination at low injection condition; (ii) the second-order decay rate is due to the non-geminate/free carrier recombination at high injection; and (iii) the third order decay rate is for the Auger recombination. When  $TiO_2$ /perovskite or  $TiO_2$ /ITIC/perovskite is analyzed, the tremendous second-order decay rate is observed for the photogenerated carrier easy injection from perovskite to the  $TiO_2$  ETL. Based on the above analysis, the PL decay time obtained by bi-exponential function is used to fit the PL decay time.

### Reference:

- [1]. C.-H. M. Chuang, P. R. Brown, V. Bulović & M. G. Bawendi. *Nat. Mater.* **2014**, *13*, 796-801.
- [2]. Z. Jin, Q. Zhou, Y. Chen, P. Mao, H. Li, H. Liu, J. Wang & Y. Li. *Adv. Mater.* **2016**, *28*, 3697-3702.
- [3]. J. S. Manser & P. V. Kamat. *Nat Photon* **2014**, *8*, 737-743.
- [4]. B. S. Tosun & H. W. Hillhouse. *J. Phys. Chem. Lett.* **2015**, *6*, 2503-2508.

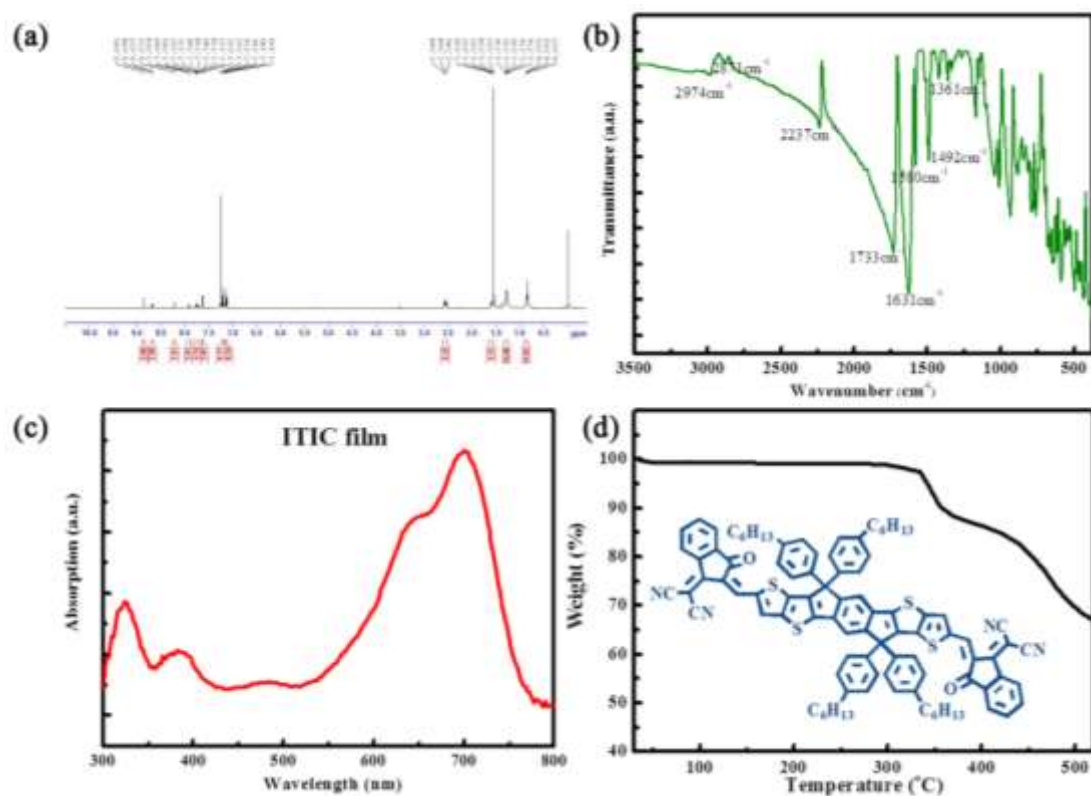

**Figure S1.** The properties of ITIC: (a)  $^1\text{H}$ -NMR, (b) FTIR spectrum, (c) film absorption spectrum and (d) TGA curve and the molecular structure.

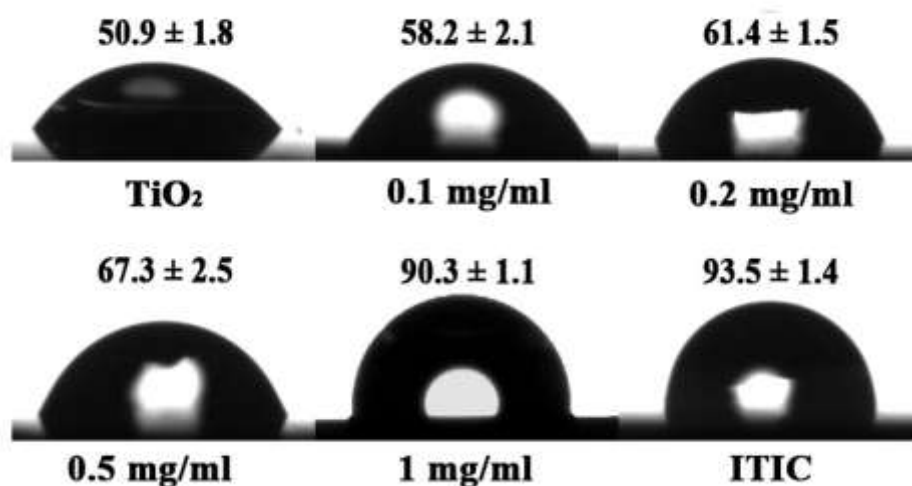

**Figure S2.** Photographs of water droplet on: pristine  $\text{TiO}_2$  film, different concentrate ITIC modified  $\text{TiO}_2$  film and pristine ITIC film.

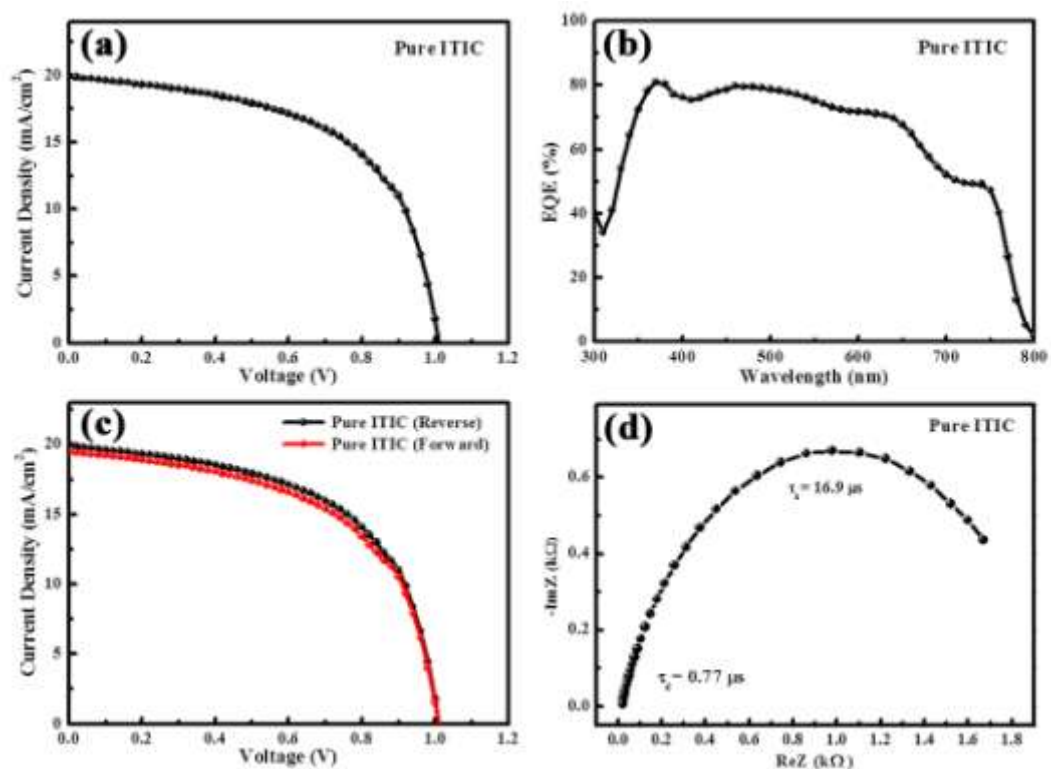

**Figure S3.** Properties of the perovskite solar cells based on ITIC ETL: (a) for J-V characteristics, (b) for EQE curve, (c) for J-V characteristics with different sweep directions (scan rate 200mV/s), (d) for IS result.

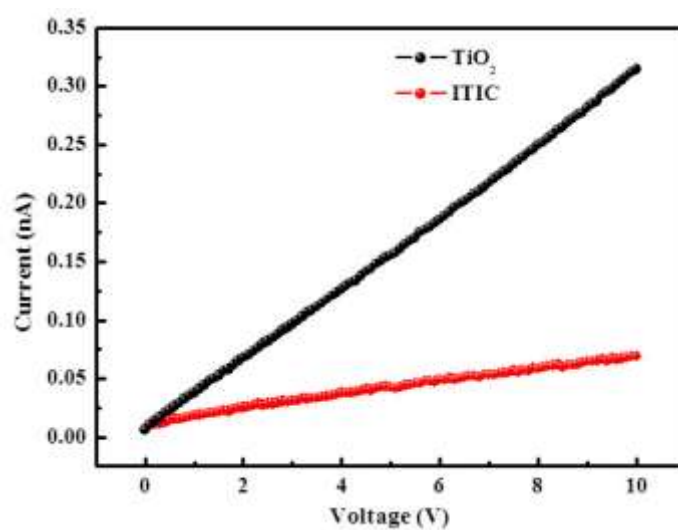

**Figure S4.** Conductivities of pristine  $\text{TiO}_2$  film and pristine ITIC film.

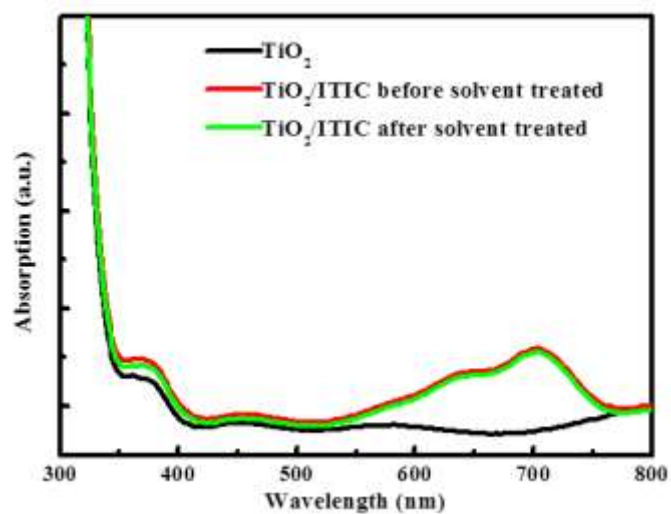

**Figure S5.** The UV-vis analysis of ITIC films before and after DMSO and GBL mixed solvent (3:7 v/v) treatment.

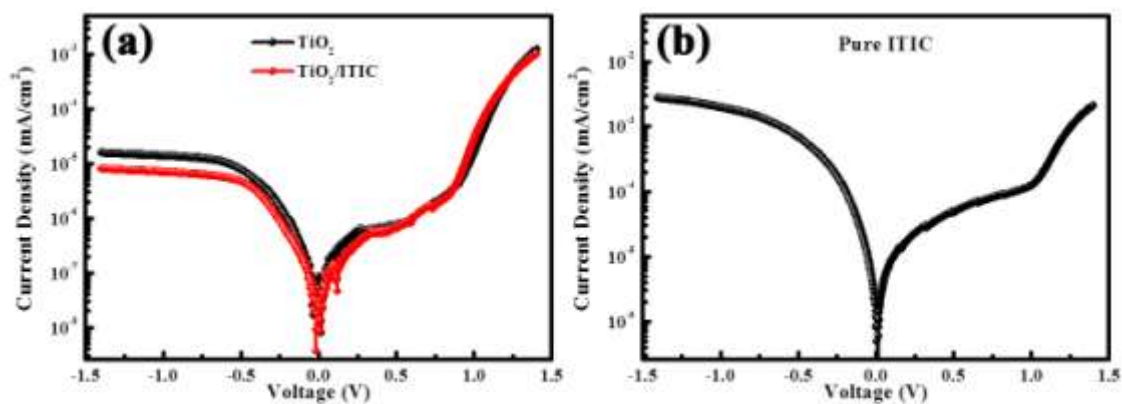

**Figure S6.** J-V characteristics of the fabricated perovskite photovoltaic solar cells with different ETL in dark condition: (a) for  $\text{TiO}_2$  ETL and  $\text{TiO}_2/\text{ITIC}$  ETL, (b) for ITIC ETL.

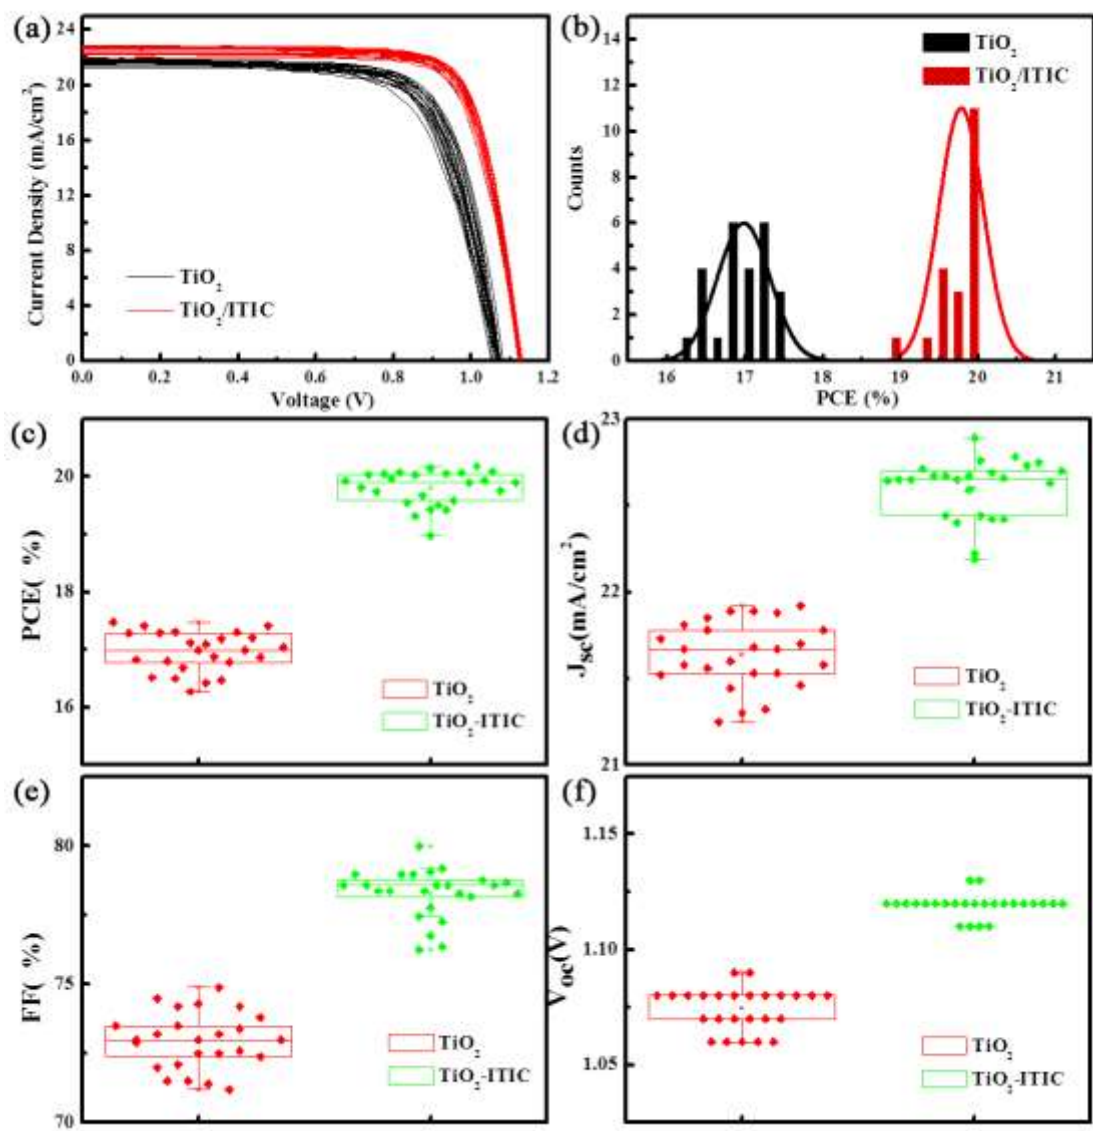

**Figure S7.** 25 individual devices were fabricated: (a) for J-V characteristics; (b) for the PCE distribution histograms; (c) for PCE distribution; (d) for  $J_{\text{sc}}$  distribution; (e) for FF distribution; and (f) for  $V_{\text{oc}}$  distribution.

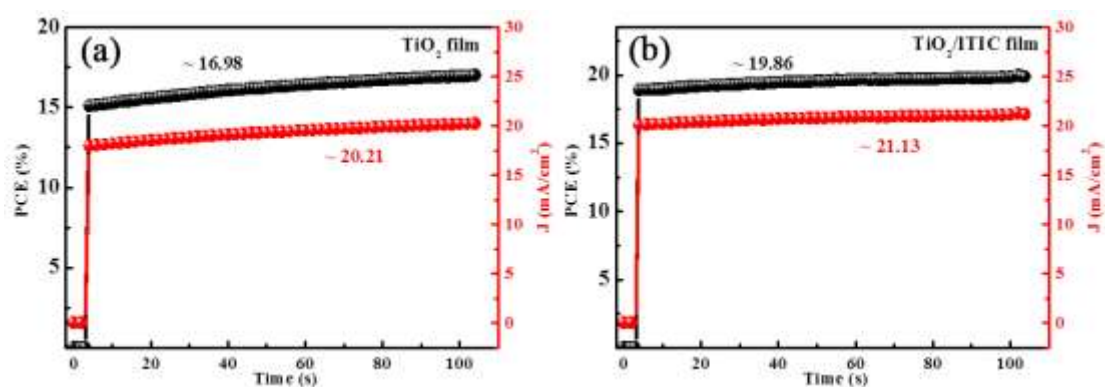

**Figure S8.** PCE measured as a function of time for the cells biased at 0.84 V for (a)  $\text{TiO}_2$  ETL and 0.94 V for (b) ITIC modified  $\text{TiO}_2$  ETL.

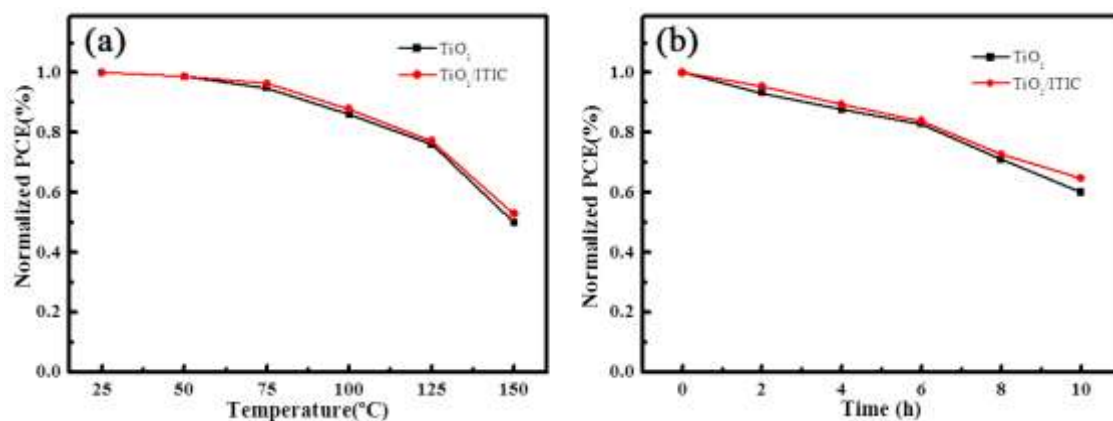

**Figure S9.** Normalized PCEs of PSCs with or without ITIC modified  $\text{TiO}_2$  ETL: (a) after annealing different temperature for 10 min and (b) after annealing at 80 °C for different times.

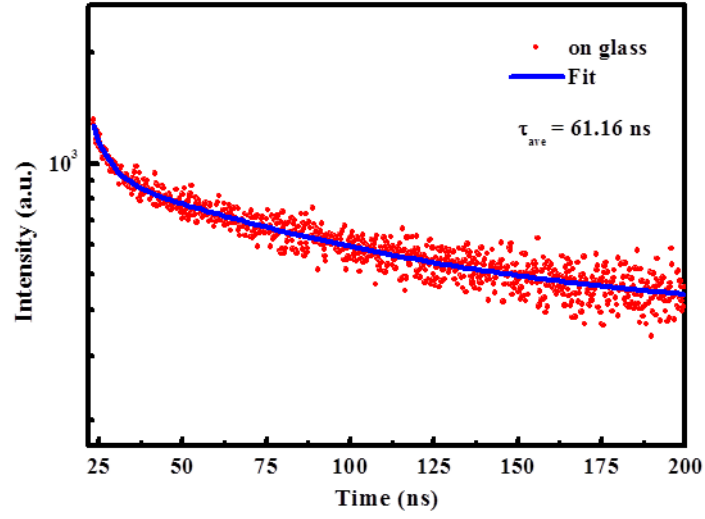

**Figure S10.** TRPL spectrum of perovskite deposited on glass substrate.

**Table S1.** EIS parameters for the PSCs with TiO<sub>2</sub> ETL and TiO<sub>2</sub>/ITIC ETL.

| Buffer layer           | $R_s$ ( $\Omega$ ) | $R_{tr}$ ( $\Omega$ ) | $R_{rec}$ ( $\Omega$ ) | $C_{tr}$ (F)         | $C_{rec}$ (F)        |
|------------------------|--------------------|-----------------------|------------------------|----------------------|----------------------|
| TiO <sub>2</sub>       | 30                 | 190                   | 1350                   | $5.2 \times 10^{-8}$ | $2.0 \times 10^{-7}$ |
| TiO <sub>2</sub> /ITIC | 25                 | 300                   | 2800                   | $2.4 \times 10^{-8}$ | $1.1 \times 10^{-7}$ |

**Table S2.** Parameters of the TRPL spectra based on PSCs with TiO<sub>2</sub> ETL and TiO<sub>2</sub>/ITIC ETL.

| Buffer layer           | $\tau_{ave}$ (ns) | $\tau_1$ (ns) | $\tau_2$ (ns) | % of $\tau_1$ | % of $\tau_2$ |
|------------------------|-------------------|---------------|---------------|---------------|---------------|
| TiO <sub>2</sub>       | 47.83             | 67.45         | 9.28          | 21.28         | 78.72         |
| TiO <sub>2</sub> /ITIC | 17.04             | 34.93         | 7.07          | 10.02         | 89.98         |
